# Supplementary material
Source: publisher figshare collection journal article supplement (https://gsapubs.figshare.com/ndownloader/files/23321045)
Supplement: Supplementary file 1 [file 23321045]

GES00758

The supplemental files associated this paper are still being loaded. We apologize for the inconvenience.  
For more information, contact [editing@geosociety.org](mailto:editing@geosociety.org)
